# Supplementary material
Source: publisher figshare collection journal article supplement (https://acs.figshare.com/ndownloader/files/5694879)
Supplement: Supplementary file 1 [file 5694879]

# ic020641q.cif

data_70PNAM

_publ_block_id

; Oct 17 11:21:10 |(C3H7NH3)AlF[(HO)O2PC2H4PO3] (1)||

;

_audit_creation_date  Oct 17 11:21:10

_audit_creation_method  "from EXP file using GSAS2CIF"

_audit_update_record

; Oct 17 11:21:10 2002  Initial CIF as created by GSAS2CIF

;


#_publ_contact_author                ?


#_publ_contact_author_email          ?


#_publ_contact_author_fax            ?


#_publ_contact_author_phone          ?


#_publ_contact_letter                ?


#_publ_requested_journal             ?


_publ_section_title

;(C3H7NH3)AlF[(HO)O2PC2H4PO3] (1)

;


loop_

_publ_author_name

_publ_author_address


#_publ_section_abstract              ?


#_publ_section_comment               ?


#_publ_section_acknowledgements      ?


#_publ_section_references            ?


#_publ_section_figure_captions       ?


#_publ_section_exptl_prep            ?


#_publ_section_exptl_refinement      ?


data_70PNAM_overall


_refine_ls_shift/esd_max               0.14

_refine_ls_shift/esd_mean              0.02

_computing_structure_refinement        GSAS

_refine_ls_number_parameters           51

_refine_ls_goodness_of_fit_all         1.63

_refine_ls_number_restraints           18

data_70PNAM_phase_1


_pd_block_id

        Oct 17 11:21:10 |PHASE_1||


_pd_phase_name

_cell_length_a                         8.20481(10)

_cell_length_b                         6.90652(6)

_cell_length_c                         19.6598(4)

_cell_angle_alpha                      90.0

_cell_angle_beta                       90.0

_cell_angle_gamma                      90.0

_symmetry_cell_setting                 orthorhombic

_symmetry_space_group_name_H-M         "P n m a"

loop_ _symmetry_equiv_pos_as_xyz

     +x,+y,+z -x+1/2,+y+1/2,+z+1/2 +x,-y+1/2,+z -x+1/2,-y,+z+1/2 -x,-y,-z

     +x+1/2,-y+1/2,-z+1/2 -x,+y+1/2,-z +x+1/2,+y,-z+1/2


loop_ _atom_site_label

        _atom_site_fract_x

        _atom_site_fract_y

        _atom_site_fract_z

        _atom_site_occupancy

        _atom_site_thermal_displace_type

        _atom_site_U_iso_or_equiv

        _atom_site_symmetry_multiplicity

P1     -0.1452(5)    0.25         0.11765(20)  1.0        Uiso
0.0170(8)     4

P2      0.2528(4)    0.25         0.08578(21)  1.0        Uiso
0.0170(8)     4

Al1     0.0          0.5          0.0          1.0        Uiso
0.0098(12)    4

F1     -0.0129(8)    0.25        -0.03210(31)  1.0        Uiso
0.0204(9)     4

O1     -0.1301(6)    0.4249(6)    0.07385(24)  1.0        Uiso
0.0204(9)     8

O2     -0.3063(8)    0.25         0.1605(4)    1.0        Uiso
0.0204(9)     4

O3      0.1955(5)    0.0703(6)    0.04713(26)  1.0        Uiso
0.0204(9)     8

O4      0.4418(8)    0.25         0.0789(5)    1.0        Uiso
0.0204(9)     4

C11     0.0027(11)   0.75         0.8128(5)    1.0        Uiso
0.0204(9)     4

C12     0.1781(12)   0.25         0.1688(4)    1.0        Uiso
0.0204(9)     4

C13    -0.0314(14)   0.75         0.3340(4)    1.0        Uiso
0.0204(9)     4

C14    -0.0485(13)   0.25         0.5970(4)    1.0        Uiso
0.0204(9)     4

C15     0.1061(14)   0.75         0.2821(6)    1.0        Uiso
0.0204(9)     4

N16     0.0832(12)   0.25         0.5451(5)    1.0        Uiso
0.0204(9)     4


loop_ _atom_type_symbol

        _atom_type_number_in_cell

                     C  20.0

                     P   8.0

                     AL  4.0

                     F   4.0

                     O  24.0

                     N   4.0

data_70PNAM_p_01


_pd_block_id

       Oct 17 11:21:10 |POWSET_01||  stn2.3

#_pd_meas_datetime_initiated           ?

#_pd_meas_info_author_name             ?

#_pd_meas_info_author_email            ?

#_pd_meas_info_author_address          ?

#_pd_meas_info_author_telephone        ?

#_diffrn_ambient_temperature           ?

#_diffrn_ambient_environment           ?

#_diffrn_ambient_pressure              ?

#_diffrn_radiation_source              ?

#_diffrn_radiation_detector            ?

loop_  _pd_phase_id

_pd_phase_block_id      Oct 17 11:21:10 |PHASE_1||

_pd_instr_radiation_probe              x-ray

_diffrn_radiation_polarisn_ratio       0.98

_diffrn_radiation_wavelength           1.299948

#_diffrn_radiation_type                ?

_pd_proc_ls_prof_R_factor              0.0718

_pd_proc_ls_prof_wR_factor             0.0842

_pd_proc_ls_prof_wR_expected           0.0516

_pd_proc_info_datetime                 "Oct 17 11:21:10 2002"

_pd_calc_method                        "Rietveld Refinement"

_pd_meas_2theta_range_min              6.51

_pd_meas_2theta_range_max              84.49

_pd_meas_2theta_range_inc              0.01

_pd_proc_2theta_range_min              6.51

_pd_proc_2theta_range_max              84.49

_pd_proc_2theta_range_inc              0.01

#===END

#  (H3NC2H4NH3)Al(OH)[O3PC2H4PO3] (2) IC020641Q


#  CIF produced by WinGX routine CIF_UPDATE

#  Created on 2002-07-06 at 13:24:07

#  Using CIFtbx version 2.6.2 16 Jun 1998


#  Dictionary name : cif_core.dic

#  Dictionary vers : 2.2

#  Request file    : C:\Chemprog\wingx\files\cifdoc.dat

#  CIF files read  : hgh143


#------------------ SECTION 1. GLOBAL INFORMATION ---------------------------#


_publ_section_synopsis


   Farrugia, L. J. (1997) ORTEP-3 for Windows, J. Appl. Cryst. 30, 565.


   Farrugia, L. J. (1999) WinGX, J. Appl. Cryst. 32, 837-838.


   Sheldrick, G.M. (1993) SHELXL93. Program for crystal structure

     refinement. University of G\"ottingen, Germany.


   Sheldrick, G.M. (1997) SHELXL97. Program for crystal structure

     refinement. University of G\"ottingen, Germany.


   Sheldrick, G.M. (1985). SHELXS86. In Crystallographic Computing 3,

   edited by G. M. Sheldrick, C. Kruger & R. Goddard, pp. 175-189.

   Oxford University Press.


   Sheldrick, G.M. (1997) SHELXS97. Program for Crystal Structure solution.

     University of G\"ottingen, Germany.


#------------------  SECTION 2. COMPOUND(S) DETAILS -------------------------#


data_hgh143


_audit_creation_date            2002-07-06T13:24:07-00:00

_audit_creation_method         'WinGX routine CIF_UPDATE'


#------------------ CHEMICAL INFORMATION ------------------------------------#


_chemical_formula_sum                   'C4 H15 Al N2 O7 P2'

_chemical_formula_weight                292.1


#------------------ UNIT CELL INFORMATION -----------------------------------#


_symmetry_cell_setting                  Monoclinic

_symmetry_space_group_name_H-M          P21/n

loop_

      _symmetry_equiv_pos_as_xyz

'x, y, z'

'-x+1/2, y+1/2, -z+1/2'

'-x, -y, -z'

'x-1/2, -y-1/2, z-1/2'


_cell_length_a                          11.142(3)

_cell_length_b                          7.0078(18)

_cell_length_c                          12.903(3)

_cell_angle_alpha                       90

_cell_angle_beta                        96.240(6)

_cell_angle_gamma                       90

_cell_volume                            1001.5(4)

_cell_formula_units_Z                   4

_cell_measurement_temperature           293(2)

_cell_measurement_theta_min             4

_cell_measurement_theta_max             5


#------------------ CRYSTAL INFORMATION -------------------------------------#


_exptl_crystal_description              needles

_exptl_crystal_colour                   colourless

_exptl_crystal_size_max                 0.06

_exptl_crystal_size_mid                 0.01

_exptl_crystal_size_min                 0.01

_exptl_crystal_density_diffrn           1.937

_exptl_crystal_density_method           'not measured'

_exptl_crystal_F_000                    608

_exptl_absorpt_coefficient_mu           0.432

_exptl_absorpt_correction_type          SADABS

_exptl_absorpt_correction_T_min         1

_exptl_absorpt_correction_T_max         1


#------------------ DATA COLLECTION INFORMATION -----------------------------#


_diffrn_radiation_wavelength            0.6893

_diffrn_radiation_type                  synchrotron

_diffrn_measurement_device_type         smart

_diffrn_measurement_device              smart

_diffrn_measurement_method              smart

_diffrn_reflns_number                   5683

_diffrn_reflns_av_R_equivalents         0.0575

_diffrn_reflns_limit_h_min              -15

_diffrn_reflns_limit_h_max              10

_diffrn_reflns_limit_k_min              -8

_diffrn_reflns_limit_k_max              9

_diffrn_reflns_limit_l_min              -17

_diffrn_reflns_limit_l_max              17

_diffrn_reflns_theta_min                2.23

_diffrn_reflns_theta_max                29.45

_diffrn_reflns_theta_full               29.45

_diffrn_measured_fraction_theta_max

                                          0.897

_diffrn_measured_fraction_theta_full

                                          0.897

_reflns_number_total                    2721

_reflns_number_gt                       1846

_reflns_threshold_expression            >2sigma(I)


#------------------ COMPUTER PROGRAMS USED ----------------------------------#


_computing_data_collection              smart

_computing_cell_refinement              saint

_computing_data_reduction               smart

_computing_structure_solution           shelx86

_computing_structure_refinement         'SHELXL-97 (Sheldrick, 1997)'


#------------------ REFINEMENT INFORMATION ----------------------------------#


_refine_ls_structure_factor_coef        Fsqd

_refine_ls_matrix_type                  full

_refine_ls_weighting_scheme             calc

_refine_ls_weighting_details

           'calc w=1/[\s^2^(Fo^2^)+(0.0559P)^2^+0.0000P] where
P=(Fo^2^+2Fc^2^)/3'

_refine_ls_hydrogen_treatment           mixed

_refine_ls_extinction_method            none

_refine_ls_number_reflns                2721

_refine_ls_number_parameters            205

_refine_ls_number_restraints            1

_refine_ls_R_factor_gt                  0.0526

_refine_ls_wR_factor_ref                0.126

_refine_ls_goodness_of_fit_ref          1.009

_refine_ls_restrained_S_all             1.01

_refine_ls_shift/su_max                 0.003

_refine_diff_density_max                0.538

_refine_diff_density_min                -0.467


#------------------ ATOMIC TYPES, COORDINATES AND THERMAL PARAMETERS --------#


loop_

      _atom_type_symbol

      _atom_type_description

      _atom_type_scat_dispersion_real

      _atom_type_scat_dispersion_imag

      _atom_type_scat_source

C C 0.003 0.002 'International Tables Vol C Tables 4.2.6.8 and 6.1.1.4'

H H 0 0 'International Tables Vol C Tables 4.2.6.8 and 6.1.1.4'

Al Al 0.061 0.048 'International Tables Vol C Tables 4.2.6.8 and 6.1.1.4'

N N 0.006 0.003 'International Tables Vol C Tables 4.2.6.8 and 6.1.1.4'

O O 0.01 0.006 'International Tables Vol C Tables 4.2.6.8 and 6.1.1.4'

P P 0.097 0.089 'International Tables Vol C Tables 4.2.6.8 and 6.1.1.4'


loop_

      _atom_site_label

      _atom_site_type_symbol

      _atom_site_fract_x

      _atom_site_fract_y

      _atom_site_fract_z

      _atom_site_U_iso_or_equiv

      _atom_site_adp_type

      _atom_site_occupancy

      _atom_site_calc_flag

      _atom_site_refinement_flags

      _atom_site_disorder_group

      _atom_site_disorder_assembly

N1 N 0.6033(3) 0.7691(4) 0.4736(2) 0.0158(6) Uani 1 d . . .

N2 N 0.6768(3) 0.5402(4) 0.6869(2) 0.0131(6) Uani 1 d . . .

C3 C 0.5924(3) 0.7029(5) 0.6655(3) 0.0182(7) Uani 1 d . . .

C4 C 0.6319(4) 0.8355(5) 0.5839(3) 0.0187(8) Uani 1 d . . .

H3 H 1.046(3) 1.350(5) 0.486(3) 0.011(9) Uiso 1 d . . .

H4 H 1.042(4) 1.125(7) 0.478(4) 0.039(13) Uiso 1 d . . .

H13 H 1.242(4) 1.415(6) 0.302(3) 0.025(11) Uiso 1 d . . .

H10 H 0.518(4) 0.648(5) 0.651(3) 0.013(10) Uiso 1 d . . .

H1 H 0.881(3) 1.363(6) 0.570(3) 0.015(10) Uiso 1 d . . .

H9 H 0.600(4) 0.953(7) 0.590(3) 0.023(11) Uiso 1 d . . .

H6 H 0.515(4) 0.745(6) 0.462(4) 0.035(13) Uiso 1 d . . .

H2 H 0.879(4) 1.147(6) 0.570(3) 0.020(11) Uiso 1 d . . .

H5 H 0.627(4) 0.864(7) 0.437(3) 0.028(12) Uiso 1 d . . .

H7 H 0.643(4) 0.655(7) 0.460(3) 0.027(12) Uiso 1 d . . .

H12 H 0.652(4) 0.437(8) 0.732(4) 0.046(15) Uiso 1 d . . .

H14 H 0.679(4) 0.452(7) 0.621(4) 0.039(14) Uiso 1 d . . .

H11 H 0.595(4) 0.768(6) 0.738(4) 0.027(12) Uiso 1 d . . .

H8 H 0.709(4) 0.859(7) 0.592(3) 0.033(13) Uiso 1 d . . .

H15 H 0.867(3) 0.796(8) 0.331(4) 0.058(17) Uiso 1 d D . .

P1 P 0.97934(7) 1.27008(11) 0.32370(6) 0.00896(19) Uani 1 d . . .

P2 P 0.72889(7) 1.27087(11) 0.45269(6) 0.00877(18) Uani 1 d . . .

Al1 Al 0.74697(9) 1.02527(13) 0.24821(8) 0.0085(2) Uani 1 d . . .

O7 O 0.78609(19) 0.7764(3) 0.29759(17) 0.0074(4) Uani 1 d D . .

O2 O 0.6412(2) 1.2804(3) 0.53482(18) 0.0137(5) Uani 1 d . . .

O1 O 0.7087(2) 1.0930(3) 0.38491(17) 0.0109(5) Uani 1 d . . .

O4 O 0.9101(2) 1.0933(3) 0.28139(18) 0.0112(5) Uani 1 d . . .

O3 O 0.7205(2) 1.4552(3) 0.38886(17) 0.0108(5) Uani 1 d . . .

O5 O 0.9158(2) 1.4545(3) 0.28688(18) 0.0111(5) Uani 1 d . . .

O6 O 1.1089(2) 1.2650(3) 0.29776(18) 0.0125(5) Uani 1 d . . .

C2 C 0.9916(3) 1.2565(5) 0.4649(3) 0.0125(6) Uani 1 d . . .

C1 C 0.8769(3) 1.2565(5) 0.5238(3) 0.0130(6) Uani 1 d . . .


loop_

      _atom_site_aniso_label

      _atom_site_aniso_U_11

      _atom_site_aniso_U_22

      _atom_site_aniso_U_33

      _atom_site_aniso_U_23

      _atom_site_aniso_U_13

      _atom_site_aniso_U_12

N1 0.0157(14) 0.0095(14) 0.0236(15) 0.0026(12) 0.0084(12) 0.0002(12)

N2 0.0135(15) 0.0106(14) 0.0163(15) 0.0003(11) 0.0062(12) -0.0017(11)

C3 0.0154(17) 0.0171(17) 0.0231(19) 0.0027(14) 0.0069(14) 0.0005(14)

C4 0.0186(18) 0.0128(18) 0.024(2) 0.0016(13) 0.0015(15) -0.0001(14)

P1 0.0081(4) 0.0060(4) 0.0133(4) -0.0009(3) 0.0036(3) -0.0004(3)

P2 0.0097(4) 0.0057(4) 0.0116(4) -0.0001(3) 0.0042(3) -0.0004(3)

Al1 0.0092(4) 0.0041(4) 0.0129(4) 0.0000(3) 0.0043(3) -0.0003(3)

O7 0.0086(10) 0.0029(9) 0.0112(10) -0.0002(8) 0.0028(8) -0.0009(8)

O2 0.0154(11) 0.0133(11) 0.0137(11) -0.0021(9) 0.0077(9) -0.0016(9)

O1 0.0142(12) 0.0062(11) 0.0129(12) -0.0008(8) 0.0046(9) -0.0022(8)

O4 0.0096(12) 0.0068(10) 0.0174(12) -0.0017(9) 0.0029(9) -0.0009(8)

O3 0.0155(12) 0.0059(11) 0.0117(12) 0.0014(8) 0.0037(9) 0.0014(9)

O5 0.0127(12) 0.0034(10) 0.0175(13) 0.0005(8) 0.0024(9) -0.0014(8)

O6 0.0083(10) 0.0114(11) 0.0188(11) -0.0033(9) 0.0052(8) -0.0017(9)

C2 0.0101(14) 0.0119(16) 0.0158(15) -0.0008(12) 0.0029(12) -0.0022(13)

C1 0.0154(15) 0.0120(16) 0.0117(15) -0.0004(12) 0.0024(12) -0.0019(13)


#------------------ MOLECULAR GEOMETRY --------------------------------------#


_geom_special_details

;

   All esds (except the esd in the dihedral angle between two l.s. planes)

   are estimated using the full covariance matrix.  The cell esds are taken

   into account individually in the estimation of esds in distances, angles

   and torsion angles; correlations between esds in cell parameters are only

   used when they are defined by crystal symmetry.  An approximate (isotropic)

   treatment of cell esds is used for estimating esds involving l.s. planes.

;

loop_

      _geom_bond_atom_site_label_1

      _geom_bond_atom_site_label_2

      _geom_bond_distance

      _geom_bond_site_symmetry_2

      _geom_bond_publ_flag

N1 C4 1.498(5) . ?

N2 C3 1.485(4) . ?

C3 C4 1.506(5) . ?

P1 O6 1.517(2) . ?

P1 O5 1.524(2) . ?

P1 O4 1.529(2) . ?

P1 C2 1.815(3) . ?

P2 O2 1.519(2) . ?

P2 O1 1.525(2) . ?

P2 O3 1.529(2) . ?

P2 C1 1.801(3) . ?

Al1 O7 1.880(2) 2_655 ?

Al1 O4 1.883(2) . ?

Al1 O5 1.888(3) 2_645 ?

Al1 O7 1.891(2) . ?

Al1 O3 1.908(3) 2_645 ?

Al1 O1 1.919(3) . ?

O7 Al1 1.880(2) 2_645 ?

O3 Al1 1.908(3) 2_655 ?

O5 Al1 1.888(3) 2_655 ?

C2 C1 1.556(5) . ?


loop_

      _geom_angle_atom_site_label_1

      _geom_angle_atom_site_label_2

      _geom_angle_atom_site_label_3

      _geom_angle

      _geom_angle_site_symmetry_1

      _geom_angle_site_symmetry_3

      _geom_angle_publ_flag

N2 C3 C4 112.1(3) . . ?

N1 C4 C3 115.1(3) . . ?

O6 P1 O5 111.82(13) . . ?

O6 P1 O4 110.95(13) . . ?

O5 P1 O4 112.13(12) . . ?

O6 P1 C2 104.51(14) . . ?

O5 P1 C2 109.83(14) . . ?

O4 P1 C2 107.22(14) . . ?

O2 P2 O1 111.71(13) . . ?

O2 P2 O3 109.41(14) . . ?

O1 P2 O3 112.62(13) . . ?

O2 P2 C1 105.67(14) . . ?

O1 P2 C1 108.45(15) . . ?

O3 P2 C1 108.70(14) . . ?

O7 Al1 O4 89.19(10) 2_655 . ?

O7 Al1 O5 91.17(10) 2_655 2_645 ?

O4 Al1 O5 179.03(12) . 2_645 ?

O7 Al1 O7 177.62(8) 2_655 . ?

O4 Al1 O7 88.58(10) . . ?

O5 Al1 O7 91.07(10) 2_645 . ?

O7 Al1 O3 90.01(10) 2_655 2_645 ?

O4 Al1 O3 89.99(11) . 2_645 ?

O5 Al1 O3 89.11(11) 2_645 2_645 ?

O7 Al1 O3 90.85(10) . 2_645 ?

O7 Al1 O1 90.10(10) 2_655 . ?

O4 Al1 O1 91.96(11) . . ?

O5 Al1 O1 88.94(11) 2_645 . ?

O7 Al1 O1 89.13(10) . . ?

O3 Al1 O1 178.06(11) 2_645 . ?

Al1 O7 Al1 136.65(12) 2_645 . ?

P2 O1 Al1 134.07(14) . . ?

P1 O4 Al1 136.34(14) . . ?

P2 O3 Al1 135.24(14) . 2_655 ?

P1 O5 Al1 134.36(14) . 2_655 ?

C1 C2 P1 120.9(2) . . ?

C2 C1 P2 120.5(2) . . ?

#===END

#  (NH4)2AlF(O3PCH2PO3) (3) IC020641Q

#  CIF produced by WinGX routine CIF_UPDATE

#  Created on 2002-07-04 at 13:35:41

#  Using CIFtbx version 2.6.2 16 Jun 1998


#  Dictionary name : cif_core.dic

#  Dictionary vers : 2.2

#  Request file    : C:\Chemprog\wingx\files\archive.dat

#  CIF files read  : 178_2


data_178_2


_audit_creation_date            2002-07-04T13:35:41-00:00

_audit_creation_method         'WinGX routine CIF_UPDATE'

_audit_conform_dict_name        cif_core.dic

_audit_conform_dict_version     2.2

_audit_conform_dict_location    ftp://ftp.iucr.org/pub/cif_core.dic

_publ_requested_category        FM


#----------------------------------------------------------------------------#

#                   CHEMICAL INFORMATION                                     #

#----------------------------------------------------------------------------#


_chemical_name_systematic

;

   ?

;

_chemical_formula_sum                   'C H10 Al F N2 O6 P2'

_chemical_formula_weight                254.03


#----------------------------------------------------------------------------#

#                   UNIT CELL INFORMATION                                    #

#----------------------------------------------------------------------------#


loop_

      _symmetry_equiv_pos_as_xyz

'x, y, z'

'-x, -y, z+1/2'

'x, -y, -z'

'-x, y, -z+1/2'

'x+1/2, y+1/2, z'

'-x+1/2, -y+1/2, z+1/2'

'x+1/2, -y+1/2, -z'

'-x+1/2, y+1/2, -z+1/2'

'-x, -y, -z'

'x, y, -z-1/2'

'-x, y, z'

'x, -y, z-1/2'

'-x+1/2, -y+1/2, -z'

'x+1/2, y+1/2, -z-1/2'

'-x+1/2, y+1/2, z'

'x+1/2, -y+1/2, z-1/2'


_cell_length_a                          16.592(2)

_cell_length_b                          7.5106(9)

_cell_length_c                          7.0021(9)

_cell_angle_alpha                       90

_cell_angle_beta                        90

_cell_angle_gamma                       90

_cell_volume                            872.57(19)

_cell_formula_units_Z                   4

_cell_measurement_temperature           153(2)


#----------------------------------------------------------------------------#

#                   CRYSTAL INFORMATION                                      #

#----------------------------------------------------------------------------#

_exptl_crystal_size_max                 0.15

_exptl_crystal_size_mid                 0.1

_exptl_crystal_size_min                 0.03

_exptl_crystal_density_diffrn           1.934

_exptl_crystal_density_method           'not measured'

_exptl_crystal_F_000                    520

_exptl_special_details

;

;


#----------------------------------------------------------------------------#

#                   ABSORPTION CORRECTION                                    #

#----------------------------------------------------------------------------#


_exptl_absorpt_coefficient_mu           0.62


#----------------------------------------------------------------------------#

#                   DATA COLLECTION                                          #

#----------------------------------------------------------------------------#


_diffrn_ambient_temperature             153(2)

_diffrn_radiation_wavelength            0.71073

_diffrn_radiation_type                  MoK\a

_diffrn_radiation_monochromator         graphite

_diffrn_reflns_av_R_equivalents         0.0557

_diffrn_reflns_av_unetI/netI            0.0693

_diffrn_reflns_number                   2246

_diffrn_reflns_limit_h_min              -21

_diffrn_reflns_limit_h_max              15

_diffrn_reflns_limit_k_min              -9

_diffrn_reflns_limit_k_max              8

_diffrn_reflns_limit_l_min              -7

_diffrn_reflns_limit_l_max              8

_diffrn_reflns_theta_min                2.98

_diffrn_reflns_theta_max                27.48

_diffrn_reflns_theta_full               27.48

_diffrn_measured_fraction_theta_full

                                          0.989

_diffrn_measured_fraction_theta_max

                                          0.989

_reflns_number_total                    556

_reflns_number_gt                       393

_reflns_threshold_expression            >2sigma(I)


#----------------------------------------------------------------------------#

#                   COMPUTER PROGRAMS USED                                   #

#----------------------------------------------------------------------------#


_computing_structure_refinement         'SHELXL-97 (Sheldrick, 1997)'


#----------------------------------------------------------------------------#

#                   REFINEMENT INFORMATION                                   #

#----------------------------------------------------------------------------#


_refine_special_details

;

   Refinement of F^2^ against ALL reflections.  The weighted R-factor wR and

   goodness of fit S are based on F^2^, conventional R-factors R are based

   on F, with F set to zero for negative F^2^. The threshold expression of

   F^2^ > 2sigma(F^2^) is used only for calculating R-factors(gt) etc. and is

   not relevant to the choice of reflections for refinement.  R-factors based

   on F^2^ are statistically about twice as large as those based on F, and R-

   factors based on ALL data will be even larger.

;

_refine_ls_structure_factor_coef        Fsqd

_refine_ls_matrix_type                  full

_refine_ls_weighting_scheme             calc

_refine_ls_weighting_details

           'calc w=1/[\s^2^(Fo^2^)+(0.0501P)^2^+0.6338P] where
P=(Fo^2^+2Fc^2^)/3'

_atom_sites_solution_primary            direct

_atom_sites_solution_secondary          difmap

_atom_sites_solution_hydrogens          geom

_refine_ls_hydrogen_treatment           mixed

_refine_ls_extinction_method            none

_refine_ls_number_reflns                556

_refine_ls_number_parameters            53

_refine_ls_number_restraints            0

_refine_ls_R_factor_all                 0.0655

_refine_ls_R_factor_gt                  0.0362

_refine_ls_wR_factor_ref                0.0939

_refine_ls_wR_factor_gt                 0.0774

_refine_ls_goodness_of_fit_ref          0.876

_refine_ls_restrained_S_all             0.876

_refine_ls_shift/su_max                 0

_refine_ls_shift/su_mean                0

_refine_diff_density_max                0.333

_refine_diff_density_min                -0.491

_refine_diff_density_rms                0.09


#----------------------------------------------------------------------------#

#                   ATOMIC TYPES, COORDINATES AND THERMAL PARAMETERS         #

#----------------------------------------------------------------------------#


loop_

      _atom_type_symbol

      _atom_type_description

      _atom_type_scat_dispersion_real

      _atom_type_scat_dispersion_imag

      _atom_type_scat_source

C C 0.003 0.002 'International Tables Vol C Tables 4.2.6.8 and 6.1.1.4'

H H 0 0 'International Tables Vol C Tables 4.2.6.8 and 6.1.1.4'

Al Al 0.064 0.051 'International Tables Vol C Tables 4.2.6.8 and 6.1.1.4'

F F 0.017 0.01 'International Tables Vol C Tables 4.2.6.8 and 6.1.1.4'

N N 0.006 0.003 'International Tables Vol C Tables 4.2.6.8 and 6.1.1.4'

O O 0.011 0.006 'International Tables Vol C Tables 4.2.6.8 and 6.1.1.4'

P P 0.102 0.094 'International Tables Vol C Tables 4.2.6.8 and 6.1.1.4'


loop_

      _atom_site_label

      _atom_site_type_symbol

      _atom_site_fract_x

      _atom_site_fract_y

      _atom_site_fract_z

      _atom_site_U_iso_or_equiv

      _atom_site_adp_type

      _atom_site_occupancy

      _atom_site_symmetry_multiplicity

      _atom_site_calc_flag

      _atom_site_refinement_flags

      _atom_site_disorder_assembly

      _atom_site_disorder_group

H1 H 0 0.484(5) 0.155(5) 0.008(9) Uiso 1 2 d S . .

H3 H -0.178(2) 0.642(6) 0.25 0.017(10) Uiso 1 2 d S . .

H2 H -0.1525(19) 0.795(4) 0.141(5) 0.037(9) Uiso 1 1 d . . .

H4 H -0.222(2) 0.792(5) 0.25 0.005(9) Uiso 1 2 d S . .

P1 P 0.08861(5) 0.27705(13) 0.25 0.0197(3) Uani 1 2 d S . .

Al1 Al 0 0 0 0.0189(4) Uani 1 4 d S . .

F1 F 0 -0.0914(4) 0.25 0.0211(7) Uani 1 4 d S . .

O1 O 0.08100(9) 0.1611(2) 0.0702(3) 0.0199(5) Uani 1 1 d . . .

O2 O 0.16474(14) 0.3852(3) 0.25 0.0212(6) Uani 1 2 d S . .

C1 C 0 0.4158(7) 0.25 0.0187(11) Uani 1 4 d S . .

N1 N -0.1776(2) 0.7530(5) 0.25 0.0224(8) Uani 1 2 d S . .


loop_

      _atom_site_aniso_label

      _atom_site_aniso_U_11

      _atom_site_aniso_U_22

      _atom_site_aniso_U_33

      _atom_site_aniso_U_23

      _atom_site_aniso_U_13

      _atom_site_aniso_U_12

P1 0.0198(5) 0.0198(5) 0.0196(6) 0 0 -0.0008(4)

Al1 0.0200(8) 0.0182(8) 0.0185(8) -0.0004(6) 0 0

F1 0.0206(16) 0.0194(15) 0.0232(16) 0 0 0

O1 0.0197(9) 0.0200(9) 0.0199(10) -0.0002(8) 0.0003(7) -0.0011(7)

O2 0.0192(14) 0.0203(13) 0.0242(15) 0 0 -0.0002(10)

C1 0.027(3) 0.014(3) 0.015(3) 0 0 0

N1 0.018(2) 0.023(2) 0.026(2) 0 0 0.0007(14)


#----------------------------------------------------------------------------#

#                   MOLECULAR GEOMETRY                                       #

#----------------------------------------------------------------------------#


_geom_special_details

;

   All esds (except the esd in the dihedral angle between two l.s. planes)

   are estimated using the full covariance matrix.  The cell esds are taken

   into account individually in the estimation of esds in distances, angles

   and torsion angles; correlations between esds in cell parameters are only

   used when they are defined by crystal symmetry.  An approximate (isotropic)

   treatment of cell esds is used for estimating esds involving l.s. planes.

;

loop_

      _geom_bond_atom_site_label_1

      _geom_bond_atom_site_label_2

      _geom_bond_distance

      _geom_bond_site_symmetry_2

      _geom_bond_publ_flag

P1 O2 1.502(3) . ?

P1 O1 1.5365(19) . ?

P1 O1 1.5365(19) 10_556 ?

P1 C1 1.802(3) . ?

Al1 O1 1.8737(16) 9 ?

Al1 O1 1.8737(16) . ?

Al1 O1 1.8737(16) 11 ?

Al1 O1 1.8737(16) 3 ?

Al1 F1 1.8802(10) . ?

Al1 F1 1.8802(10) 9 ?

F1 Al1 1.8802(10) 2 ?

C1 P1 1.802(3) 11 ?


loop_

      _geom_angle_atom_site_label_1

      _geom_angle_atom_site_label_2

      _geom_angle_atom_site_label_3

      _geom_angle

      _geom_angle_site_symmetry_1

      _geom_angle_site_symmetry_3

      _geom_angle_publ_flag

O2 P1 O1 112.07(8) . . ?

O2 P1 O1 112.07(8) . 10_556 ?

O1 P1 O1 110.09(14) . 10_556 ?

O2 P1 C1 111.92(18) . . ?

O1 P1 C1 105.13(10) . . ?

O1 P1 C1 105.13(10) 10_556 . ?

O1 Al1 O1 180.00(15) 9 . ?

O1 Al1 O1 88.34(10) 9 11 ?

O1 Al1 O1 91.66(10) . 11 ?

O1 Al1 O1 91.66(10) 9 3 ?

O1 Al1 O1 88.34(10) . 3 ?

O1 Al1 O1 180.00(6) 11 3 ?

O1 Al1 F1 90.48(8) 9 . ?

O1 Al1 F1 89.52(8) . . ?

O1 Al1 F1 89.52(8) 11 . ?

O1 Al1 F1 90.48(8) 3 . ?

O1 Al1 F1 89.52(8) 9 9 ?

O1 Al1 F1 90.48(8) . 9 ?

O1 Al1 F1 90.48(8) 11 9 ?

O1 Al1 F1 89.52(8) 3 9 ?

F1 Al1 F1 180.00(16) . 9 ?

Al1 F1 Al1 137.19(16) 2 . ?

P1 O1 Al1 129.78(11) . . ?

P1 C1 P1 109.3(3) 11 . ?

#===END
